# Supplementary material
Source: Springer Nature journal article supplement (https://www.springermedizin.de/resource/supplementary/12936_2011_1774_MOESM1_ESM.pdf/9541704)

IC<sub>50</sub> value

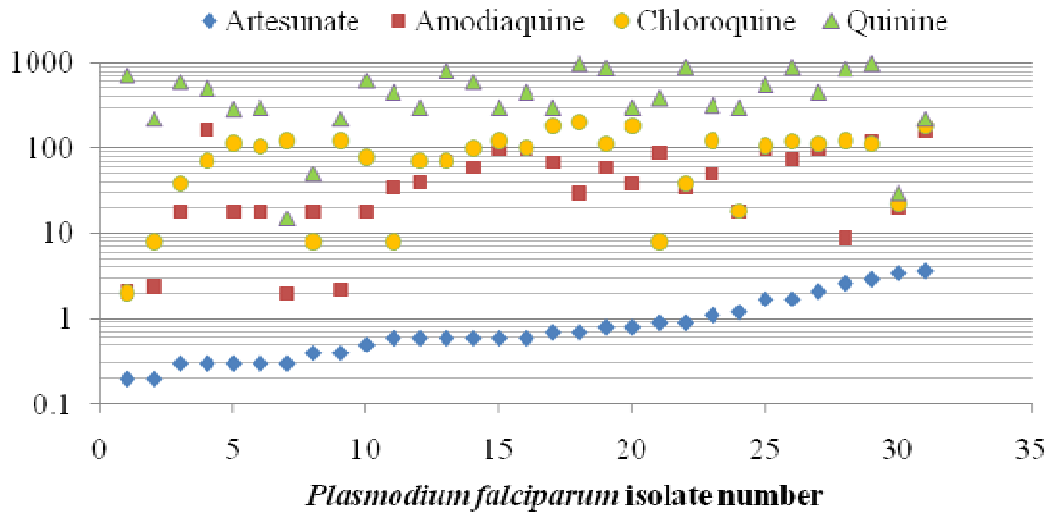

Supplement: MOESM1 [file 9541704]
